# Supplementary material for: Three-dimensional visualization of intrauterine conceptus through the uterine wall by tissue clearing method
Source: PubMed Central journal article supplement (PMC5519638; doi:10.1038/s41598-017-06549-6), 2017-07-20
Supplement: 41598_2017_6549_MOESM1_ESM.pdf [file 41598_2017_6549_MOESM1_ESM.pdf]

**Three-dimensional visualization of intrauterine conceptus through the uterine wall  
by tissue clearing method**

Kyosuke Kagami<sup>1,2</sup>, Yohei Shinmyo<sup>2</sup>, Masanori Ono<sup>1</sup>, Hiroshi Kawasaki<sup>2,3</sup>, and Hiroshi Fujiwara<sup>1</sup>

<sup>1</sup> Department of Obstetrics and Gynecology, Graduate School of Medical Sciences, Kanazawa University, Ishikawa 920-8640, Japan

<sup>2</sup> Department of Medical Neuroscience, Graduate School of Medical Sciences, Kanazawa University, Ishikawa 920-8640, Japan

<sup>3</sup> Brain/Liver Interface Medicine Research Center, Kanazawa University, Ishikawa 920-8640, Japan

**Address correspondence to**

Hiroshi Fujiwara, MD, PhD

Department of Obstetrics and Gynecology, Graduate School of Medical Sciences, Kanazawa University, Takara-machi 13-1, Kanazawa, Ishikawa 920-8640, Japan

Tel.: +81-76-265-2425, Fax: +81-76-234-4266

E-mail: fuji@kuhp.kyoto-u.ac.jp : fuji@med.kanazawa-u.ac.jp

Hiroshi Kawasaki, MD, PhD

Department of Medical Neuroscience, Graduate School of Medical Sciences, Kanazawa University, Takara-machi 13-1, Kanazawa, Ishikawa 920-8640, Japan

Tel.: +81-76-265-2363, Fax: +81-76-234-4728, E-mail: hiroshi-kawasaki@umin.ac.jp

Key words: CUBIC, 3D visualization, placenta, uterus, tissue clearing

**Supplementary Movie S1. Sequential 2D images of X-Y cross-sections of the EGFP-positive conceptus in the EGFP-negative uterus of wild-type mice.**

The EGFP-positive conceptus in the EGFP-negative uterus was created by mating CAG-EGFP male mice with wild-type ICR female mice. Pregnant mice were transcardially perfused with 4% PFA and PI solution at E10.5. After the isolated pregnant uterus was subjected to CUBIC, sequential 2D images of X-Y cross-sections were taken using a light-sheet microscope.

**Supplementary Movie S2. A 3D image of the EGFP-positive conceptus in the EGFP-negative uterus of wild-type mice.**

The EGFP-positive conceptus in the EGFP-negative uterus was created by mating CAG-EGFP male mice with wild-type ICR female mice. Pregnant mice were transcardially perfused with 4% PFA and PI solution at E10.5. After the isolated pregnant uterus was subjected to CUBIC, 3D images were taken using a light-sheet microscope.
